# Supplementary material for: An upconversion nanoparticle-integrated fibrillar scaffold combined with a NIR-optogenetic strategy to regulate neural cell performance
Source: Royal Society of Chemistry journal article supplement (doi:10.1039/d2tb02327j), 2022-12-05
Supplement: d2tb02327j1.pdf [file d2tb02327j1.pdf]

## Electronic Supplementary Information

### **Upconversion nanoparticle-integrated fibrillar scaffold combined with NIR-optogenetic strategy to regulate neural cell performance**

Chengheng Wu,<sup>a,b</sup> Borui Su,<sup>a</sup> Nini Xin,<sup>a</sup> Jiajia Tang,<sup>a</sup> Jiamei Xiao,<sup>a</sup> Hongrong Luo,<sup>a</sup> Dan Wei,<sup>a</sup> Fang Luo,<sup>c</sup> Jing Sun<sup>\*a</sup> and Hongsong Fan<sup>\*a</sup>

<sup>a</sup> National Engineering Research Center for Biomaterials, College of Biomedical Engineering, Sichuan University, Chengdu 610064, Sichuan, China

<sup>b</sup> Institute of Regulatory Science for Medical Devices, Sichuan University, Chengdu 610065, Sichuan, China

<sup>c</sup> The Center of Gerontology and Geriatrics, West China Hospital, Sichuan University, Chengdu 610041, Sichuan, China

\* Corresponding authors:

Hongsong Fan, E-mail: hsfan@scu.edu.cn

Jing Sun, E-mail: jingsun@scu.edu.cn

**Table S1.** Primer Sequences for Target Genes

| Gene  | Primer sequences                                             |
|-------|--------------------------------------------------------------|
| TuJ1  | 5'-ACAATGAGGCCTCTCTCAC-3'<br>5'-TATAGTGCCCTTTGGCCAG-3'       |
| SYP1  | 5'-AAACCACAGCTGGCTCAGAAA-3'<br>5'-AGAGACTGGGATTTGTTGAGCTG-3' |
| Ina   | 5'-AGGCTGGAAGGTAAACTCAGAC-3'<br>5'-CAATTCAGGAGTGAAGCAGGA-3'  |
| MAP-2 | 5'-GAGGCCCAACACAAGGATCA-3'<br>5'-TTCGAGGCTTCTCCAGTGC-3'      |
| GAPDH | 5'-AACCTGCCAAGTATGATGAC-3'<br>5'-GGAGTTGCTGTTGAAGTCA-3'      |

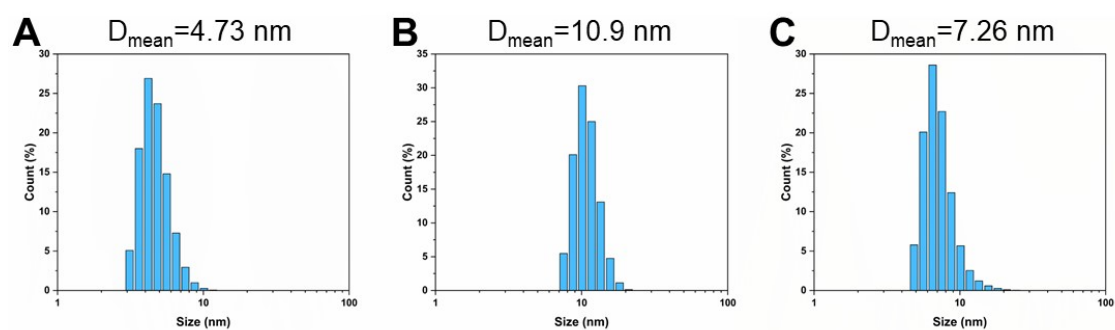

**Figure S1.** The particle size distribution of OA-capped UCNPs core, OA-capped core-shell UCNPs and OA-free core-shell UCNPs measured by DLS.

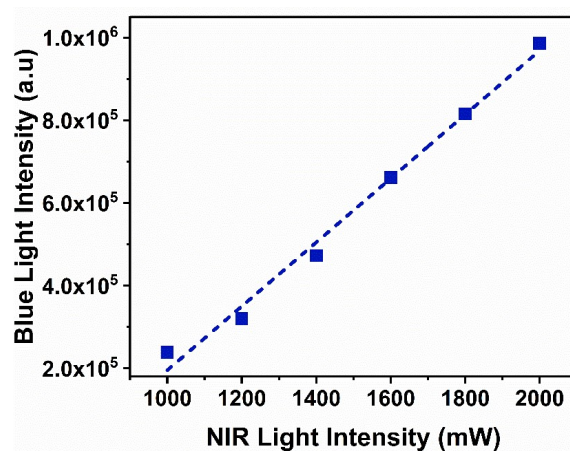

**Figure S2.** The relationship between the fluorescence intensity of PCU60 scaffold and the excitation intensity of NIR light.

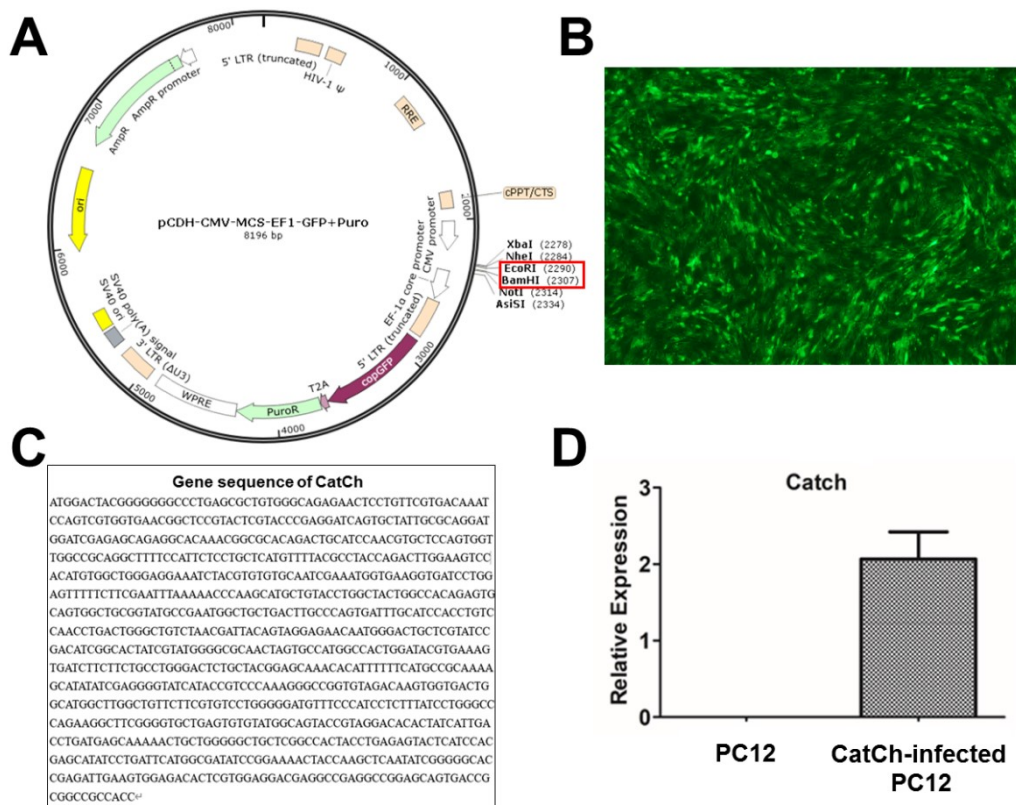

**Figure S3.** (A) The Lentiviral plasmid vector carrying the green fluorescent protein reporter gene, and the CatCh gene is connected through BamHI and EcoRI. (B) Fluorescence microscopy of CatCh-infected PC12 cells excited by 488 nm laser. (C) Gene sequence of CatCh. (D) Analysis of CatCh gene expression in CatCh-infected PC12 cells by RT-PCR.

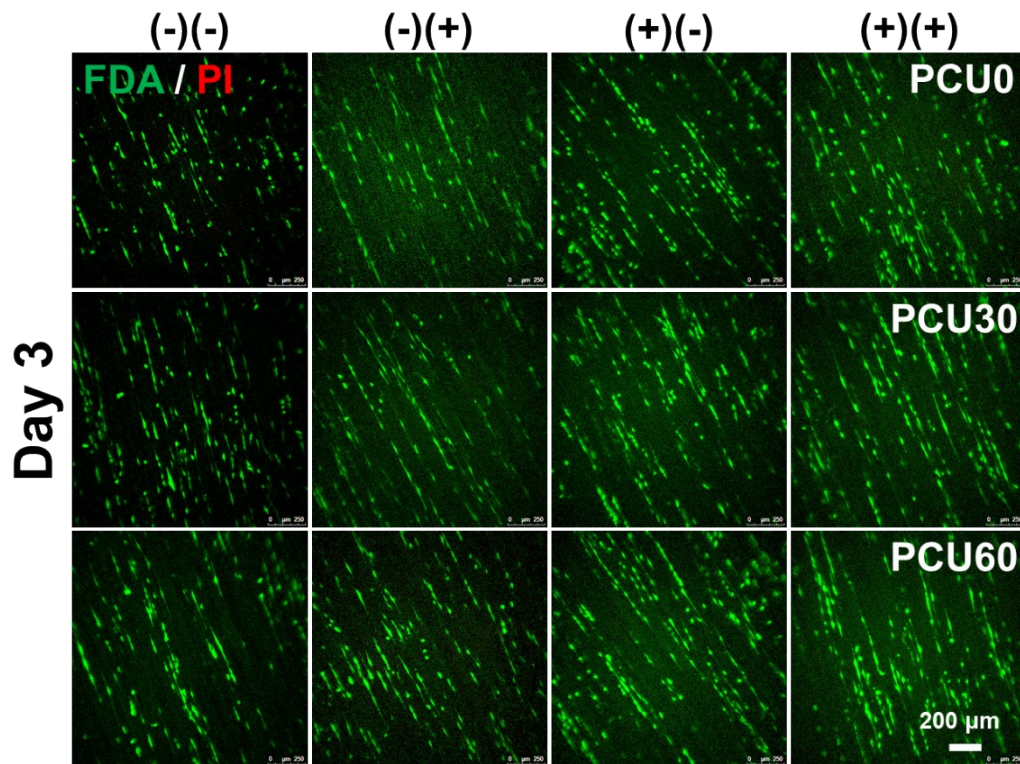

**Figure S4.** FDA (green)/PI (red) staining images of PC12 cells on different scaffold surfaces in response to NIR stimulation after 3 days.
